# Supplementary material for: Positive zero-field splitting and unexpected slow magnetic relaxation in the magneto-chemical calibrant HgCo(NCS)4
Source: Royal Society of Chemistry journal article supplement (doi:10.1039/d1dt00407g), 2021-01-01
Supplement: d1dt00407g1.pdf [file d1dt00407g1.pdf]

## Supporting information

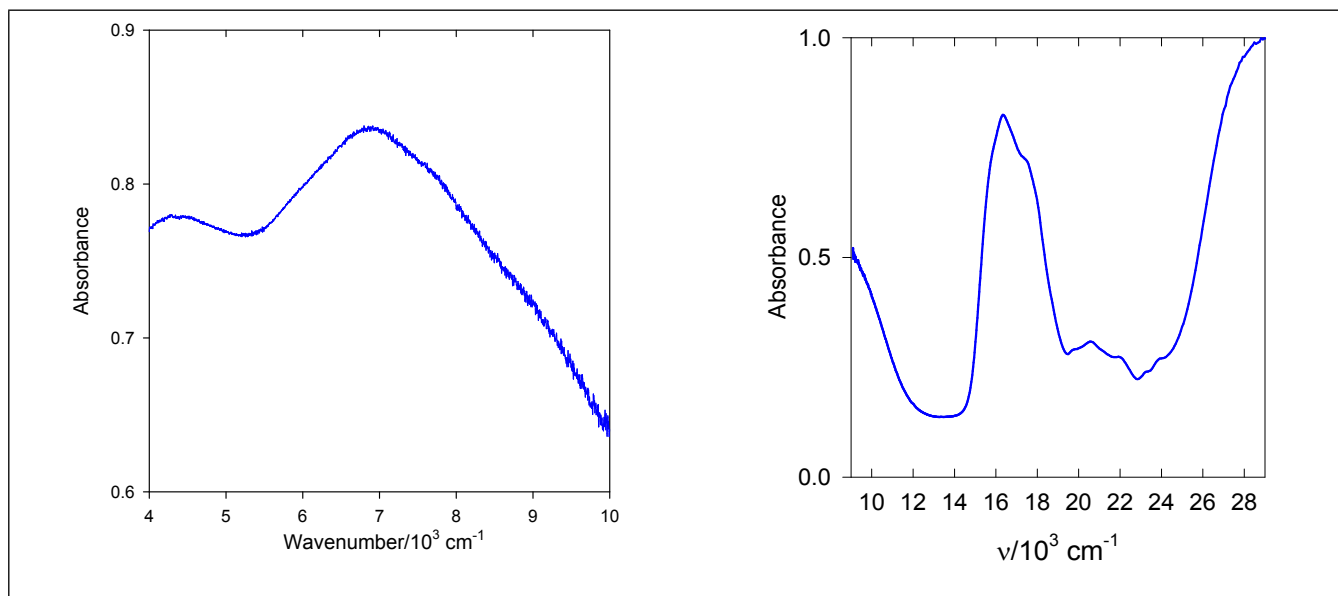

**Figure S1.** Electronic spectrum of **1** measured in the Nujol mull. Left – NIR region, right – UV/Vis. Absorbances are different due to different thickness of the samples.

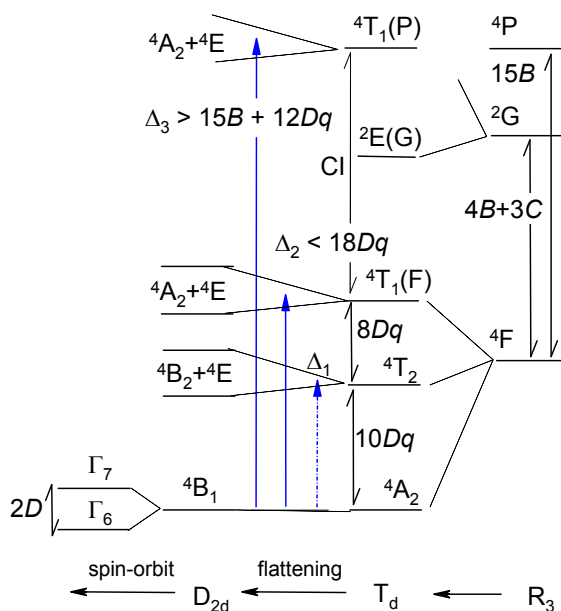

**Figure S2.** Energy levels diagram relevant to **1**.

**Table S1.** Calculated absorption spectrum by CASSCF (NEVPT2 diagonal energies)

| States      | Energy<br>(cm-1) | Wavelength<br>(nm) | fosc        | T2<br>(D**2) | TX<br>(D) | TY<br>(D) | TZ<br>(D) |
|-------------|------------------|--------------------|-------------|--------------|-----------|-----------|-----------|
| 0(0)->1(0)4 | <b>4648.6</b>    | 2151.2             | 0.000000153 | 0.00007      | -0.00508  | 0.00665   | 0.00000   |
| 0(0)->2(0)4 | 4648.6           | 2151.2             | 0.000000153 | 0.00007      | -0.00665  | -0.00508  | 0.00000   |
| 0(0)->3(0)4 | <b>5490.0</b>    | 1821.5             | 0.000000000 | 0.00000      | 0.00000   | 0.00000   | 0.00000   |
| 0(0)->4(0)4 | <b>8319.9</b>    | 1201.9             | 0.000055634 | 0.01420      | -0.00000  | -0.00000  | -0.11916  |
| 0(0)->5(0)4 | <b>8621.4</b>    | 1159.9             | 0.000064577 | 0.01591      | -0.12056  | 0.03702   | 0.00000   |
| 0(0)->6(0)4 | 8621.4           | 1159.9             | 0.000064576 | 0.01591      | -0.03702  | -0.12056  | 0.00000   |
| 0(0)->7(0)4 | <b>20352.0</b>   | 491.4              | 0.000347072 | 0.03621      | -0.06351  | -0.17938  | -0.00000  |
| 0(0)->8(0)4 | <b>20352.1</b>   | 491.4              | 0.000347071 | 0.03621      | 0.17938   | -0.06351  | 0.00000   |
| 0(0)->9(0)4 | <b>20878.6</b>   | 479.0              | 0.000413542 | 0.04206      | -0.00000  | 0.00000   | -0.20509  |

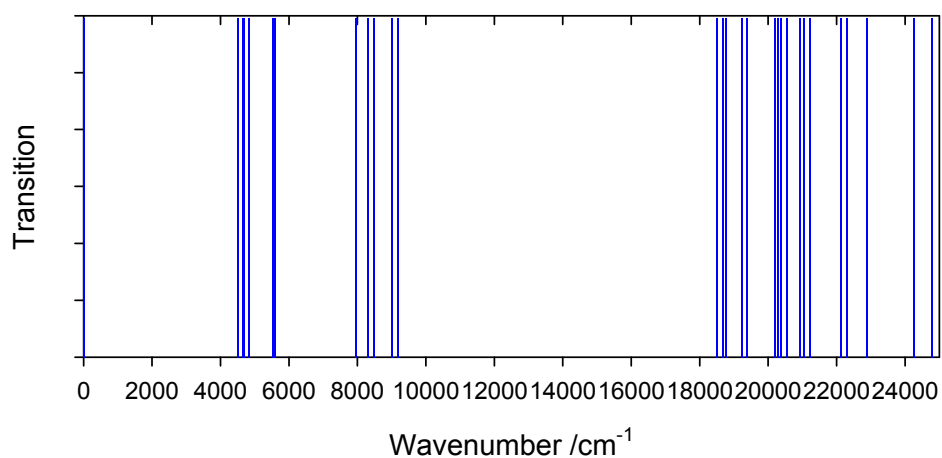

**Figure S3.** Calculated electronic transitions (spin-orbit corrected).

**Table S2.** Individual contributions to D-tensor

| Block | Mult | Root | D              | E      |
|-------|------|------|----------------|--------|
| 0     | 4    | 0    | 0.000          | 0.000  |
| 0     | 4    | 1    | <b>12.465</b>  | -8.660 |
| 0     | 4    | 2    | <b>12.465</b>  | 8.660  |
| 0     | 4    | 3    | <b>-21.252</b> | -0.000 |
| 0     | 4    | 4    | -0.000         | 0.000  |
| 0     | 4    | 5    | 0.003          | -0.003 |
| 0     | 4    | 6    | 0.003          | 0.003  |
| 0     | 4    | 7    | 0.000          | 0.000  |
| 0     | 4    | 8    | 0.000          | -0.000 |
| 0     | 4    | 9    | 0.000          | 0.000  |
| 1     | 2    | 0    | 0.000          | -0.000 |
| 1     | 2    | 1    | -0.000         | -0.000 |
| 1     | 2    | 2    | -0.068         | -0.067 |
| 1     | 2    | 3    | -0.068         | 0.067  |
| 1     | 2    | 4    | 0.000          | -0.000 |
| 1     | 2    | 5    | 0.000          | 0.000  |
| 1     | 2    | 6    | <b>-3.156</b>  | -1.393 |
| 1     | 2    | 7    | <b>-3.156</b>  | 1.393  |
| 1     | 2    | 8    | <b>6.098</b>   | 0.000  |
| 1     | 2    | 9    | -0.073         | 0.073  |
| 1     | 2    | 10   | -0.073         | -0.073 |
| 1     | 2    | 11   | <b>-0.186</b>  | -0.118 |
| 1     | 2    | 12   | <b>-0.186</b>  | 0.118  |
| 1     | 2    | 13   | -0.000         | -0.000 |
| 1     | 2    | 14   | <b>0.405</b>   | 0.000  |
| 1     | 2    | 15   | 0.000          | 0.000  |
| 1     | 2    | 16   | 0.000          | 0.000  |
| 1     | 2    | 17   | -0.000         | 0.000  |
| 1     | 2    | 18   | -0.000         | -0.000 |
| 1     | 2    | 19   | 0.000          | 0.000  |
| 1     | 2    | 20   | 0.000          | 0.000  |
| 1     | 2    | 21   | -0.003         | -0.003 |
| 1     | 2    | 22   | -0.003         | 0.003  |
| 1     | 2    | 23   | <b>1.326</b>   | 0.000  |
| 1     | 2    | 24   | <b>-0.500</b>  | -0.480 |
| 1     | 2    | 25   | <b>-0.500</b>  | 0.480  |
| 1     | 2    | 26   | 0.000          | 0.000  |
| 1     | 2    | 27   | 0.000          | -0.000 |
| 1     | 2    | 28   | 0.000          | 0.000  |
| 1     | 2    | 29   | <b>-0.142</b>  | -0.136 |
| 1     | 2    | 30   | <b>-0.142</b>  | 0.136  |
| 1     | 2    | 31   | <b>0.246</b>   | 0.000  |
| 1     | 2    | 32   | 0.000          | -0.000 |
| 1     | 2    | 33   | -0.003         | 0.001  |
| 1     | 2    | 34   | -0.003         | -0.001 |
| 1     | 2    | 35   | 0.000          | -0.000 |
| 1     | 2    | 36   | 0.000          | 0.000  |
| 1     | 2    | 37   | 0.048          | -0.000 |
| 1     | 2    | 38   | -0.023         | 0.023  |
| 1     | 2    | 39   | -0.023         | -0.023 |

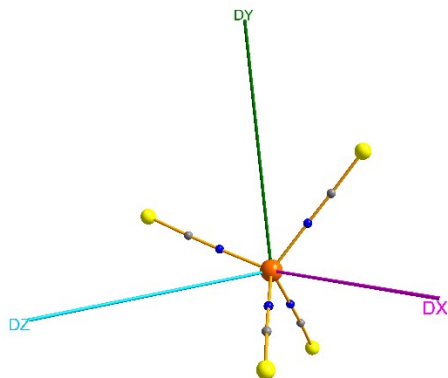

**Figure S4.** Calculated main axes of the D-tensor.

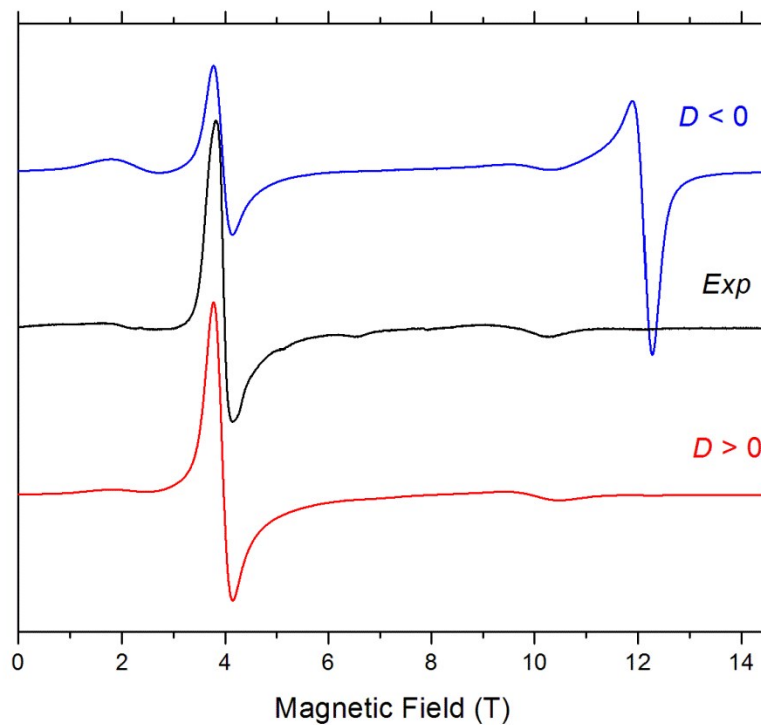

**Figure S5.** A 10 K EPR spectrum of  $\text{HgCo}(\text{NCS})_4$  at 214 GHz (black trace) and its simulations (colored traces) using the following spin Hamiltonian parameters:  $|D| = 5.39 \text{ cm}^{-1}$ ,  $E = 0$ ,  $g_{\parallel} = 2.2$ ,  $g_{\perp} = 2.14$ . Blue trace:  $D < 0$ ; red trace:  $D > 0$ .

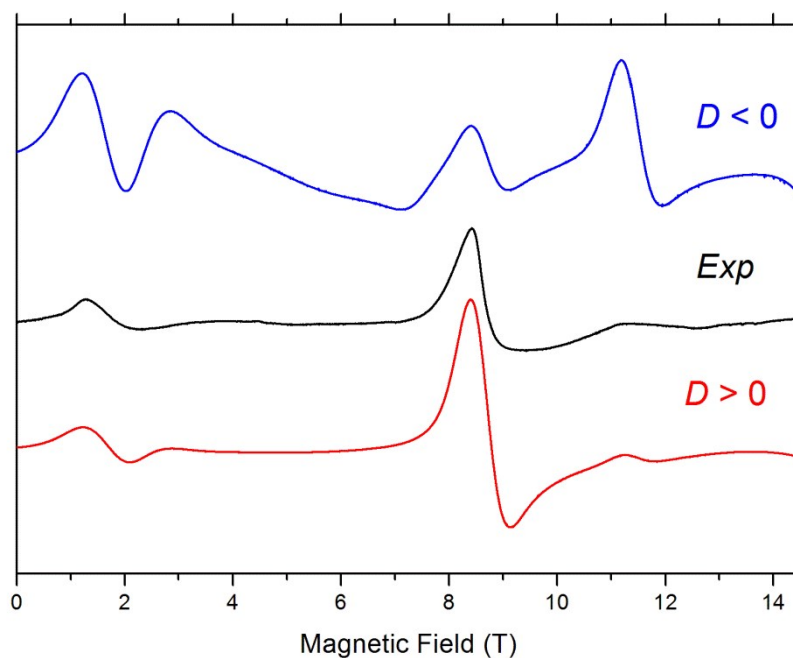

**Figure S6.** A 10 K EPR spectrum of  $\text{HgCo}(\text{NCS})_4$  at 406 GHz (black trace) and its simulations (colored traces) using the following spin Hamiltonian parameters:  $|D| = 5.39 \text{ cm}^{-1}$ ,  $E = 0$ ,  $g_{\text{iso}} = 2.2$ . Blue trace:  $D < 0$ ; red trace:  $D > 0$ .

### AC susceptibility data

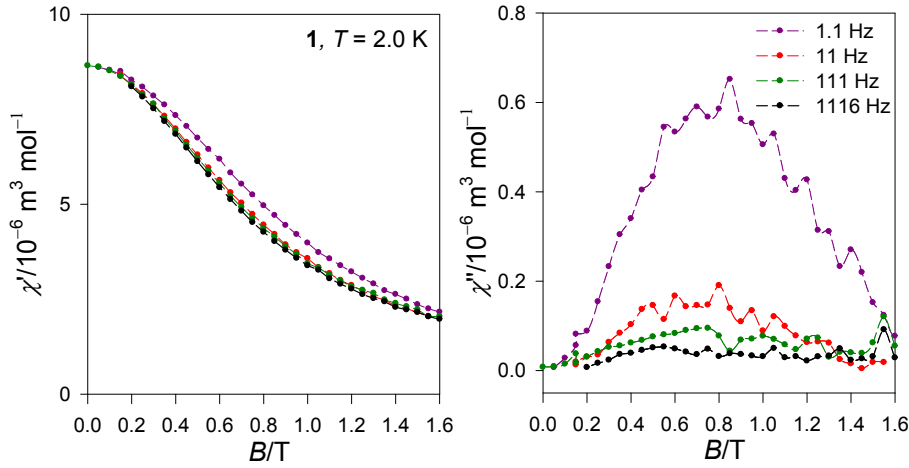

**Figure S7.** Field dependence of the AC susceptibility for **1** at  $T = 2.0$  K.

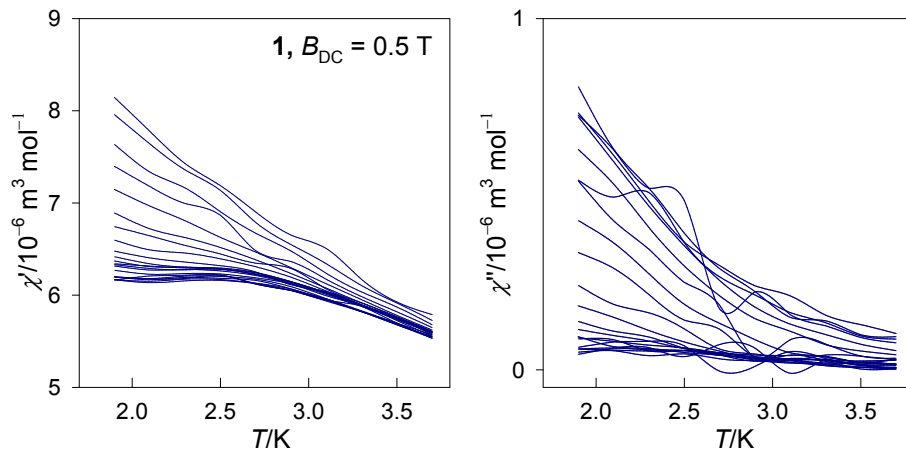

**Figure S8.** Temperature dependence of the AC susceptibility for **1**.

A quantitative analysis is based upon an extended Debye model with two relaxation processes

a) in phase component

$$\chi'(\omega) = \chi_s + (\chi_{T1} - \chi_s) \frac{1 + (\omega\tau_1)^{1-\alpha_1} \sin(\pi\alpha_1/2)}{1 + 2(\omega\tau_1)^{1-\alpha_1} \sin(\pi\alpha_1/2) + (\omega\tau_1)^{2-2\alpha_1}} + (\chi_{T2} - \chi_{T1}) \frac{1 + (\omega\tau_2)^{1-\alpha_2} \sin(\pi\alpha_2/2)}{1 + 2(\omega\tau_2)^{1-\alpha_2} \sin(\pi\alpha_2/2) + (\omega\tau_2)^{2-2\alpha_2}}$$

b) out of phase component

$$\chi''(\omega) = (\chi_{T1} - \chi_s) \frac{(\omega\tau_1)^{1-\alpha_1} \cos(\pi\alpha_1/2)}{1 + 2(\omega\tau_1)^{1-\alpha_1} \sin(\pi\alpha_1/2) + (\omega\tau_1)^{2-2\alpha_1}} + (\chi_{T2} - \chi_{T1}) \frac{(\omega\tau_2)^{1-\alpha_2} \cos(\pi\alpha_2/2)}{1 + 2(\omega\tau_2)^{1-\alpha_2} \sin(\pi\alpha_2/2) + (\omega\tau_2)^{2-2\alpha_2}}$$

for  $\omega = 2\pi f$ ;  $\chi_T$  – isothermal susceptibility (low-frequency limit),  $\chi_s$  – adiabatic susceptibility (high-frequency limit). The fitting procedure contains 7 free parameters and a combined functional  $F = w_1 \cdot R(\chi') + w_2 \cdot R(\chi'')$  is to be minimized ( $R_i$  – relative error,  $w_i$  – weight of the component).

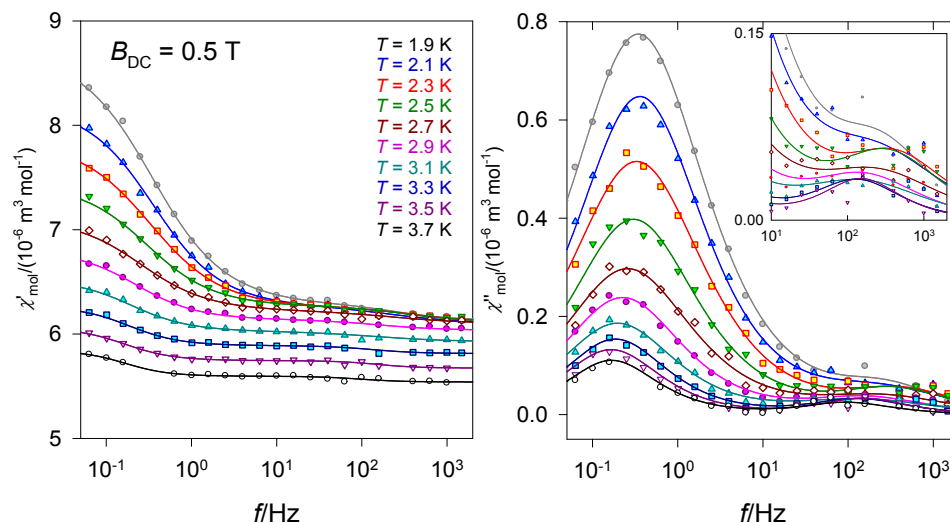

**Figure S9.** Dependence of the AC-susceptibility components upon the frequency of the AC field and temperature at  $B_{\text{DC}} = 0.5$  T. Solid lines – calculated. The fitted parameters along with their standard deviations are listed in Table S3.

While the first (low-frequency) maximum is recovered by the fitted parameters well, the characteristics of the second (high-frequency) maximum are only tentative (the signal is too low and noisy). Note, the AC susceptibility data are taken with very low amplitude of the oscillating field  $B_{\text{AC}} = 0.38$  mT and thus the data are influenced by the eddy currents and other instabilities of the superconducting magnet that rise with  $B_{\text{DC}}$ .

**Table S3.** Parameters of the two-set Debye model for **1** (two relaxation processes) at  $B_{\text{DC}} = 0.5$  T. <sup>a</sup>

| $T/\text{K}$ | $R(\chi')$ /% | $R(\chi'')$ /% | $\chi_{\text{S}}$ | $\chi_{\text{TLF}}$ | $\alpha_{\text{LF}}$ | $\tau_{\text{LF}}/\text{s}$ | $\chi_{\text{THF}}$ | $\alpha_{\text{HF}}$ | $\tau_{\text{HF}}/\text{s}$ | $\chi_{\text{LF}}$ |
|--------------|---------------|----------------|-------------------|---------------------|----------------------|-----------------------------|---------------------|----------------------|-----------------------------|--------------------|
| 1.9          | 0.31          | 2.2            | 6.13(2)           | 8.59(5)             | .28(1)               | 0.46(1)                     | 8.73(3)             | .18(16)              | 0.58(17)                    | .95                |
| 2.1          | 0.32          | 3.2            | 6.10(3)           | 8.05(6)             | .25(1)               | 0.44(1)                     | 8.21(3)             | .30(18)              | 0.63(26)                    | .92                |
| 2.3          | 0.26          | 4.1            | 6.11(2)           | 7.73(5)             | .27(1)               | 0.48(1)                     | 7.86(2)             | .20(17)              | 0.38(13)                    | .92                |
| 2.5          | 0.31          | 6.9            | 6.12(2)           | 7.30(5)             | .25(2)               | 0.53(3)                     | 7.44(3)             | .20(18)              | 0.47(16)                    | .89                |
| 2.7          | 0.27          | 6.9            | 6.10(2)           | 7.00(5)             | .26(3)               | 0.62(4)                     | 7.11(3)             | .29(20)              | 0.65(30)                    | .88                |
| 2.9          | 0.17          | 4.8            | 6.04(1)           | 6.71(3)             | .22(2)               | 0.71(3)                     | 6.81(2)             | .23(12)              | 0.97(23)                    | .87                |
| 3.1          | 0.22          | 6.5            | 5.93(1)           | 6.43(3)             | .19(3)               | 0.81(5)                     | 6.52(2)             | .29(15)              | 1.05(36)                    | .84                |
| 3.3          | 0.17          | 8.5            | 5.81(1)           | 6.19(2)             | .13(3)               | 0.86(5)                     | 6.27(1)             | .10                  | 1.18(27)                    | .84                |
| 3.5          | 0.16          | 13             | 5.67(1)           | 6.00(2)             | .12(4)               | 0.96(7)                     | 6.06(1)             | .04                  | 1.04(21)                    | .82                |
| 3.7          | 0.23          | 13             | 5.54(1)           | 5.76(1)             | .01                  | 0.88(7)                     | 5.82(1)             | .001                 | 1.15(30)                    | .80                |

<sup>a</sup> Susceptibility in  $10^{-6}$   $\text{m}^3 \text{mol}^{-1}$  (SI units).  $R(\chi')$  and  $R(\chi'')$  – discrepancy factors of the fit for the in-phase and out-of-phase susceptibility; standard deviations in parentheses.

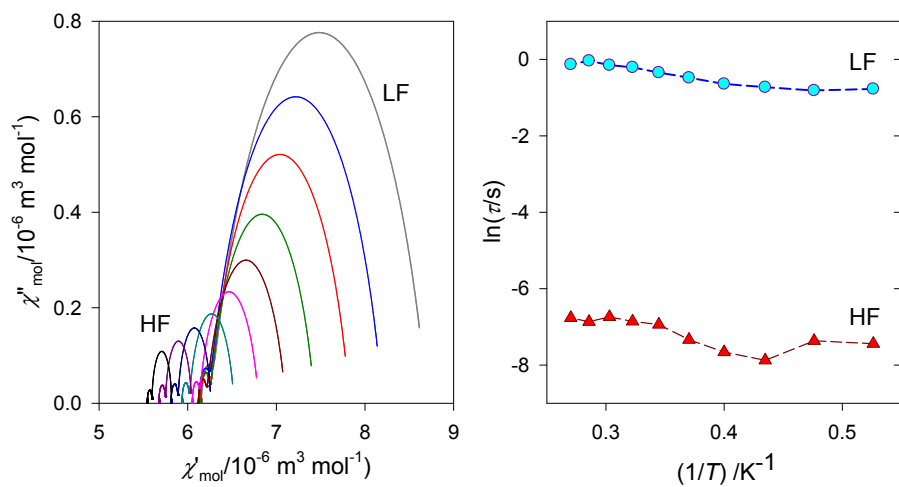

**Figure S10.** Arrhenius-like plot (left) based upon fitted data. LF – low frequency, HF – high frequency data.

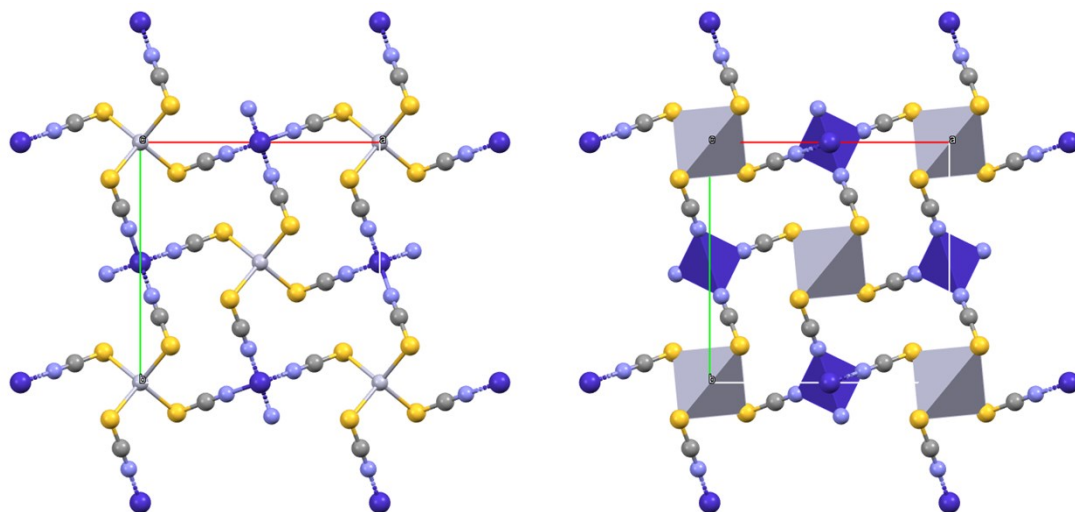

**Figure S11.** View of the unit cell of **1** showing the 3D structural motif [ICSD 36062].  
J.W. Jeffery, K.M. Rose, *Acta Crystallographica, Section B: Struct.Crystallogr.Cryst.Chem.*, 1968, 24, 653,  
DOI: [10.1107/S0567740868002980](https://doi.org/10.1107/S0567740868002980)

**Table S4.** Magnetic data and parameters for  $\text{HgCo}(\text{NCS})_4$

| Technique                 | Detail                             | $\mu_{\text{eff}} / \mu_{\text{B}}$ | $g_{\rightarrow} g_{\text{iso}}$ | $g_x$   | $\theta$ [K]          | $D/hc$ [ $\text{cm}^{-1}$ ] | Ref.      |
|---------------------------|------------------------------------|-------------------------------------|----------------------------------|---------|-----------------------|-----------------------------|-----------|
| Gouy                      | 80-300 K                           | 4.33 (300 K)<br>4.18 (90 K)         |                                  |         | -10 *                 |                             | S1        |
| Gouy                      |                                    | 4.32                                |                                  |         | -4                    |                             | S2        |
| Faraday                   | 5.8-293 K                          |                                     |                                  |         | +2                    |                             | S3        |
| Faraday                   |                                    |                                     |                                  |         | +2.4<br>-1.0<br>-0.95 |                             | S4        |
| SQUID                     |                                    |                                     |                                  |         | -1.1                  |                             | S4        |
| VSM                       | $B = 1.0$ T                        |                                     | 2.24,<br>2.21,<br>2.22(rec.)     |         | -1.86                 | +19                         | S5        |
| SQUID                     | $B = 0.008$<br>$- 0.38$ T          | 4.37 (30-100 K)                     | 2.26                             |         | -0.62                 |                             | S6        |
| SQUID                     | $B = 0.5$ T                        | 4.36 (293 K)                        | 2.22                             |         | -0.32                 | $2D = +10.6$ *              | S7        |
| SQUID                     | $B = 0.1$ T                        | 4.36 (295 K)                        | 2.223                            | 2.292   | $zj = -0.114$         | +3.86                       | This work |
| HFEP                      |                                    |                                     | 2.13(8)                          | 2.16(5) |                       | +5.23(10)<br>$E = 0.046(2)$ | This work |
| <i>Ab initio</i>          |                                    |                                     | 2.211                            | 2.264   |                       | +3.41                       | This work |
| Generalized crystal field | $10Dq =$<br>$5000 \text{ cm}^{-1}$ |                                     | 2.252                            | 2.294   |                       | +3.65                       | This work |

\* Corrected data to usual convention.

(S1) Figgis, F. N.; Nyholm, R. C. 61. Magnetochemistry. Part II. The temperature-dependence of the magnetic susceptibility of bivalent cobalt compounds. *J. Chem. Soc.*, **1959**, 338-345.

(S2) Cotton, F. A.; Goodgame, D. M. L.; Sacco, M. Magnetic Studies of High-spin Cobaltous Compounds. VII. Some Thiocyanate Complexes. *J. Am. Chem. Soc.* **1961**, 83, 4157-4161.

(S3) Rade, H.-St. Temperature dependence of the magnetic susceptibility of mercury tetrathiocyanatocobalt. *J. Phys. Chem.* **1973**, 77, 424.

(S4) Bunzli, J.-C. G. Comment of the use of  $\text{HgCo}(\text{NCS})_4$  as susceptibility standard. *Inorg. Chim. Acta.* **1979**, 36, L413-L414.

(S5) Brown, D. B.; Crawford, V. H.; Hall, J. W.; Hatfield, W. E. Standards for magnetic measurements. A comparison and a proposal for the use of tetramethylethylenediammonium tetrachlorocuprate(II). *J. Phys. Chem.* **1977**, 81, 1303-1306.

(S6) O' Connor, C. J.; Sinn, E.; Cukauskas, E. J.; Deaver, B. S. Low temperature magnetic properties and antiferromagnetic interactions of the magnetic susceptibility calibrant  $\text{HgCo}(\text{NCS})_4$ . *Inorg. Chim. Acta*, **1979**, 32, 29-32.

(S7) Nelson, D.; ter Haar, L. W. Single-crystal studies of the zero-field splitting and magnetic exchange interactions in the magnetic susceptibility calibrant mercury cobalt-thiocyanate ( $\text{HgCo}(\text{NCS})_4$ ), *Inorg. Chem.* **1993**, 32, 182-188.



### Modelling of the two-set susceptibility

A three-level model [L. T. A. Ho and L. Chibotaru, Phys. Rev. 2016, B94, 104422] brings the AC susceptibility components (in the original symbolism)

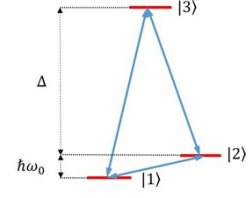

$$\chi'(\omega) = \frac{1}{T} \frac{c}{1+2c} \left( m_{11}^2 \frac{1}{1+\omega^2\tau_2^2} + \frac{m_{33}^2}{1+2c} \frac{1}{1+\omega^2\tau_3^2} \right)$$

$$\chi''(\omega) = \frac{1}{T} \frac{c}{1+2c} \left( m_{11}^2 \frac{\omega\tau_2}{1+\omega^2\tau_2^2} + \frac{m_{33}^2}{1+2c} \frac{\omega\tau_3}{1+\omega^2\tau_3^2} \right)$$

The relaxation rates involving the direct and Orbach terms are

$$\lambda_2 / \Gamma_0 = a_n T + \Gamma_0 / (c-1) = A(\Delta / k_B T)^{-1} + 1 / (c-1), \quad \tau_2^{-1} = \lambda_2$$

$$\lambda_3 / \Gamma_0 = (2c+1) / (c-1), \quad \tau_3^{-1} = \lambda_3$$

with  $A = a(\Delta / k_B) / \Gamma_0$  and  $c = \exp(\Delta / k_B T)$ ; matrix elements of the magnetic momentum  $m_{ii} = \langle i | \hat{m}_z | i \rangle$ .

The direct term is field-dependent  $\lambda_{\text{direct}} = A_{\text{direct}} B^n T = a_n T$  with typical values of  $n = 2 - 4$ .

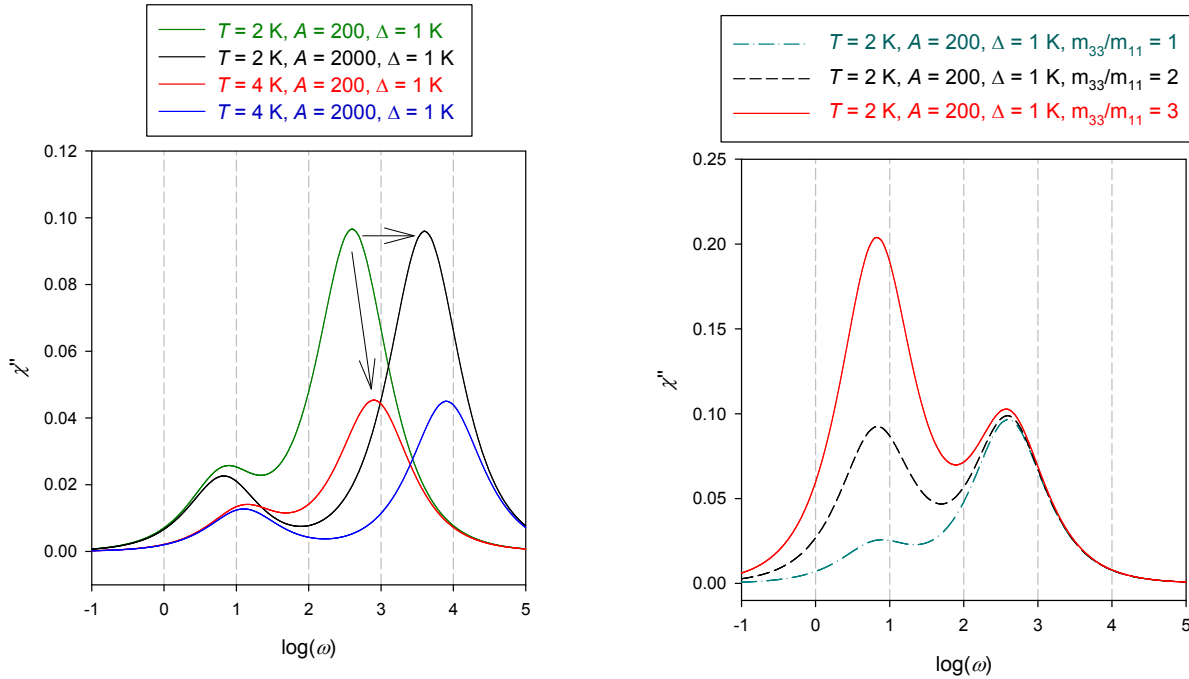

For  $m_{33} = m_{11} = 1$

- Effect of field:  $A = 200 \rightarrow 2000$ , green vs black; peak separations increases;
- Effect of temperature,  $T = 2 \rightarrow 4$  K, green vs red and black vs blue; peak maxima decrease and move to higher frequency.

Effect of matrix elements:  $m_{33} / m_{11}$ :  
 low-frequency peak increases.

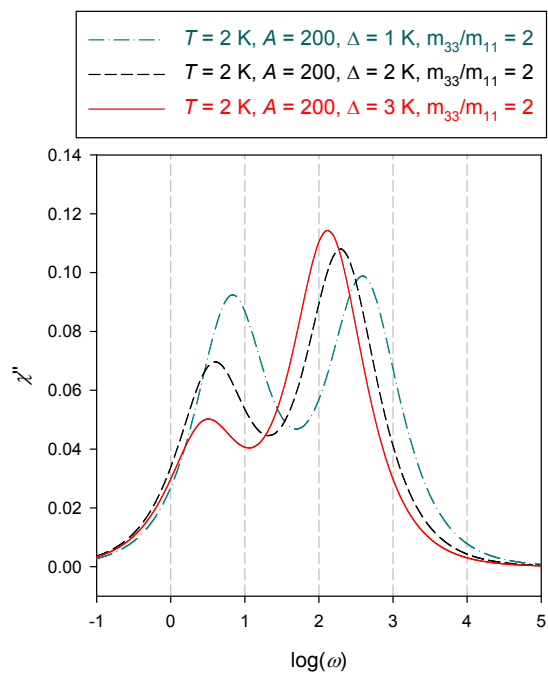

Effect of the energy gap  $\Delta$ :

- a) peak movement to lower frequencies;
  - b) peak intensity changes
- 

**Figure S12.** A modelling of the out-of-phase AC susceptibility using a three-level model.
